# Supplementary material
Source: MDPI journal article supplement (https://www.mdpi.com/2072-4292/5/10/4799)

*Supplementary Information***Global Trends in Seasonality of Normalized Difference Vegetation Index (NDVI), 1982–2011.  
*Remote Sens.* 2013, 5, 4799–4818****J. Ronald Eastman<sup>1,2,\*†</sup>, Florencia Sangermano<sup>1,2,†</sup>, Elia A. Machado<sup>3,†</sup>, John Rogan<sup>2</sup>  
and Assaf Anyamba<sup>4</sup>**

<sup>1</sup> Clark Labs, Clark University, 950 Main Street, Worcester, MA 01610, USA;  
E-Mail: fsangermano@clarku.edu

<sup>2</sup> Graduate School of Geography, Clark University, 950 Main Street, Worcester, MA 01610, USA;  
E-Mail: jrogan@clarku.edu

<sup>3</sup> Department of Earth, Environmental, and Geospatial Sciences, Lehman College, City University of  
New York, NY 10468, USA; E-Mail: elia.machado@lehman.cuny.edu

<sup>4</sup> GESTAR/USRA & Biospheric Sciences Laboratory, NASA Goddard Space Flight Center,  
Greenbelt, MD 20771, USA; E-Mail: assaf.anyamba@nasa.gov

† These authors contributed equally to this work.

\* Author to whom correspondence should be addressed; E-Mail: reastman@clarku.edu;  
Tel.: +1-508-793-7526; Fax: +1-508-793-8842.

---

This supplemental material supports the main manuscript with figures (Figures S1 and S2).

**Figure S1.** Histogram of the area of the 226 significant ( $p < 0.01$  in the CMK test) classes. The Y axis shows the area of each class in  $\text{km}^2$ . The captions for each class in the X axis (and label) indicate the significance of the five shape parameters. Significant positive trends are marked with a “+” sign, significant negative trends with a “-” sign, and insignificant trends with a 0. Reading from the bottom up, the symbols indicate the significance of trends in Amplitude 0, Amplitude 1, Phase 1, Amplitude 2 and Phase 2. Thus the left-most bar (Class 1) has a significant positive trend in Amplitude 0 and no significant trend in the other four parameters.

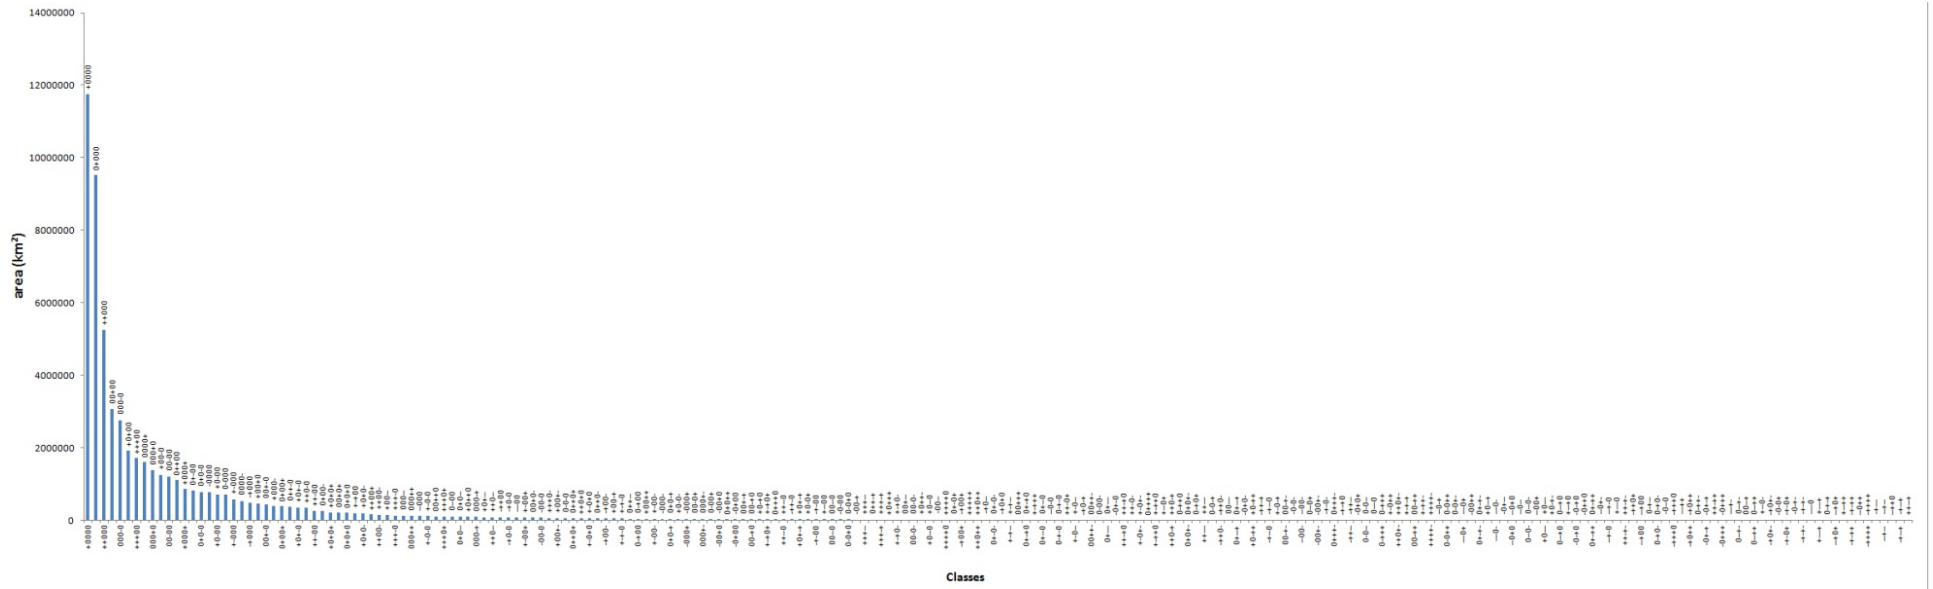

**Figure S2.** Spatial distribution of positive (green), not significant (dark gray), and negative (red) trends in mean annual NDVI (Amplitude 0). Areas with NDVI values  $< 0.15$  were masked out (light gray).

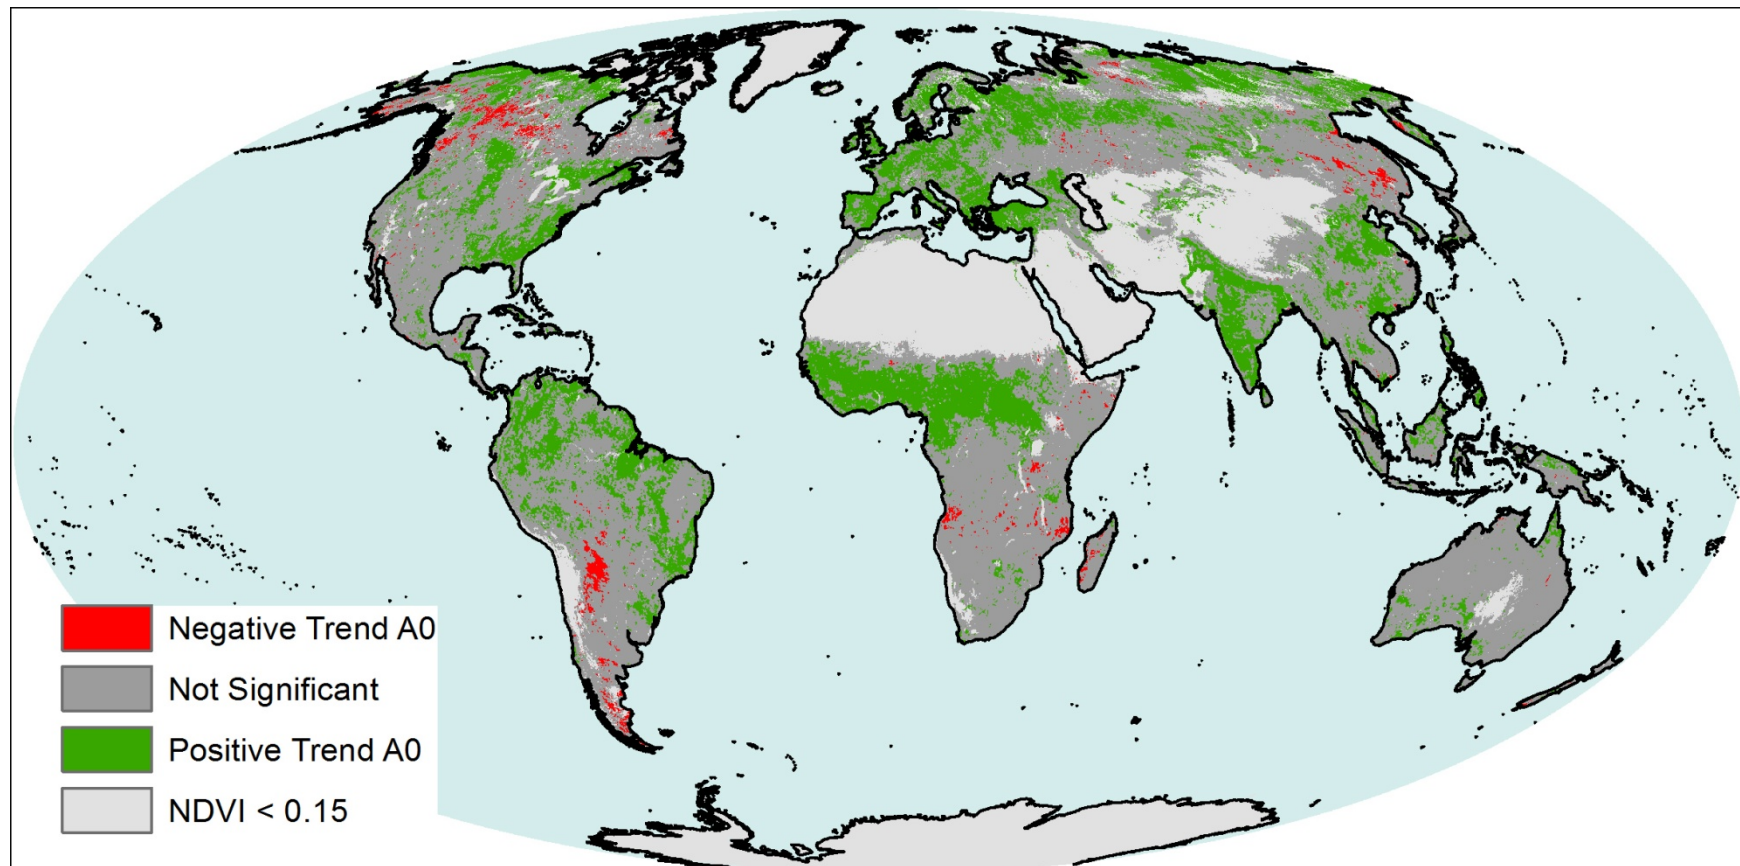

Supplement: s1 [file s1]
