# Supplementary material
Source: MDPI journal article supplement (https://www.mdpi.com/2072-4292/5/10/4799)
Supplement: s2 [file s2]

**OPEN ACCESS**

Remote Sensing

**ISSN 2072-4292**

www.mdpi.com/journal/remotesensing

*Supplementary Information*

Global Trends in Seasonality of Normalized Difference Vegetation Index (NDVI), 1982–2011. *Remote Sens*. 2013, *5*, 4799-4818

J. Ronald Eastman 1,2,*,†, Florencia Sangermano 1,2,†, Elia A. Machado 3,†, John Rogan 2 and Assaf Anyamba 4

1 Clark Labs, Clark University, 950 Main Street, Worcester, MA 01610, USA;
E-Mail: fsangermano@clarku.edu

2 Graduate School of Geography, Clark University, 950 Main Street, Worcester, MA 01610, USA;
E-Mail: jrogan@clarku.edu

3 Department of Earth, Environmental, and Geospatial Sciences, Lehman College, City University of New York, NY 10468, USA; E-Mail: elia.machado@lehman.cuny.edu

4 GESTAR/USRA & Biospheric Sciences Laboratory, NASA Goddard Space Flight Center, Greenbelt, MD 20771, USA; E-Mail: assaf.anyamba@nasa.gov

**†** These authors contributed equally to this work.

***** Author to whom correspondence should be addressed; E-Mail: reastman@clarku.edu;
Tel.: +1-508-793-7526; Fax: +1-508-793-8842.

This supplemental material supports the main manuscript with figures (Figures S1 and S2).

**Figure S1.** Histogram of the area of the 226 significant (p < 0.01 in the CMK test) classes. The Y axis shows the area of each class in km2. The captions for each class in the X axis (and label) indicate the significance of the five shape parameters. Significant positive trends are marked with a “+” sign, significant negative trends with a “−” sign, and insignificant trends with a 0. Reading from the bottom up, the symbols indicate the significance of trends in Amplitude 0, Amplitude 1, Phase 1, Amplitude 2 and Phase 2. Thus the left-most bar (Class 1) has a significant positive trend in Amplitude 0 and no significant trend in the other four parameters.


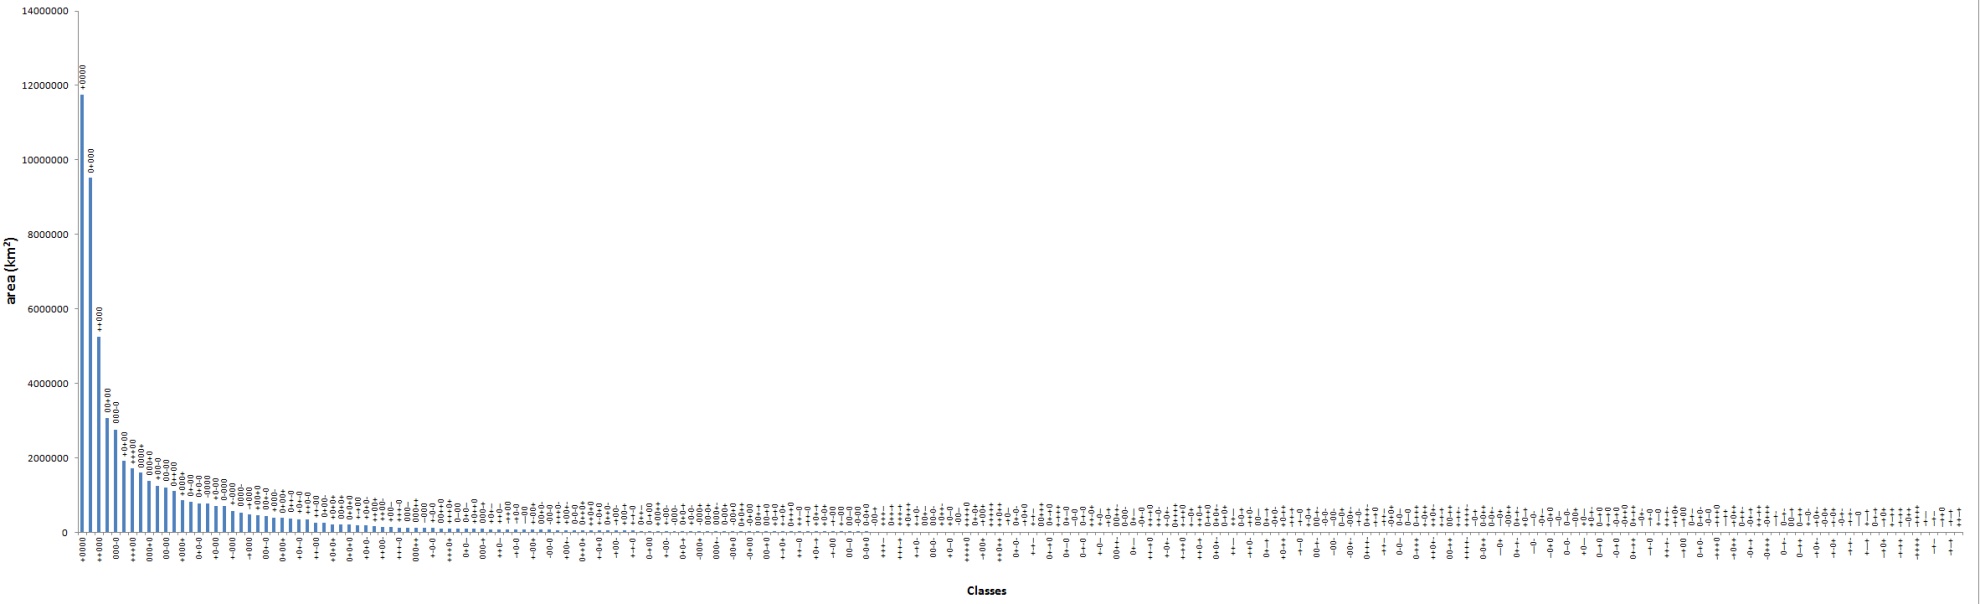


**Figure S2.** Spatial distribution of positive (green), not significant (dark gray), and negative (red) trends in mean annual NDVI (Amplitude 0). Areas with NDVI values < 0.15 were masked out (light gray).


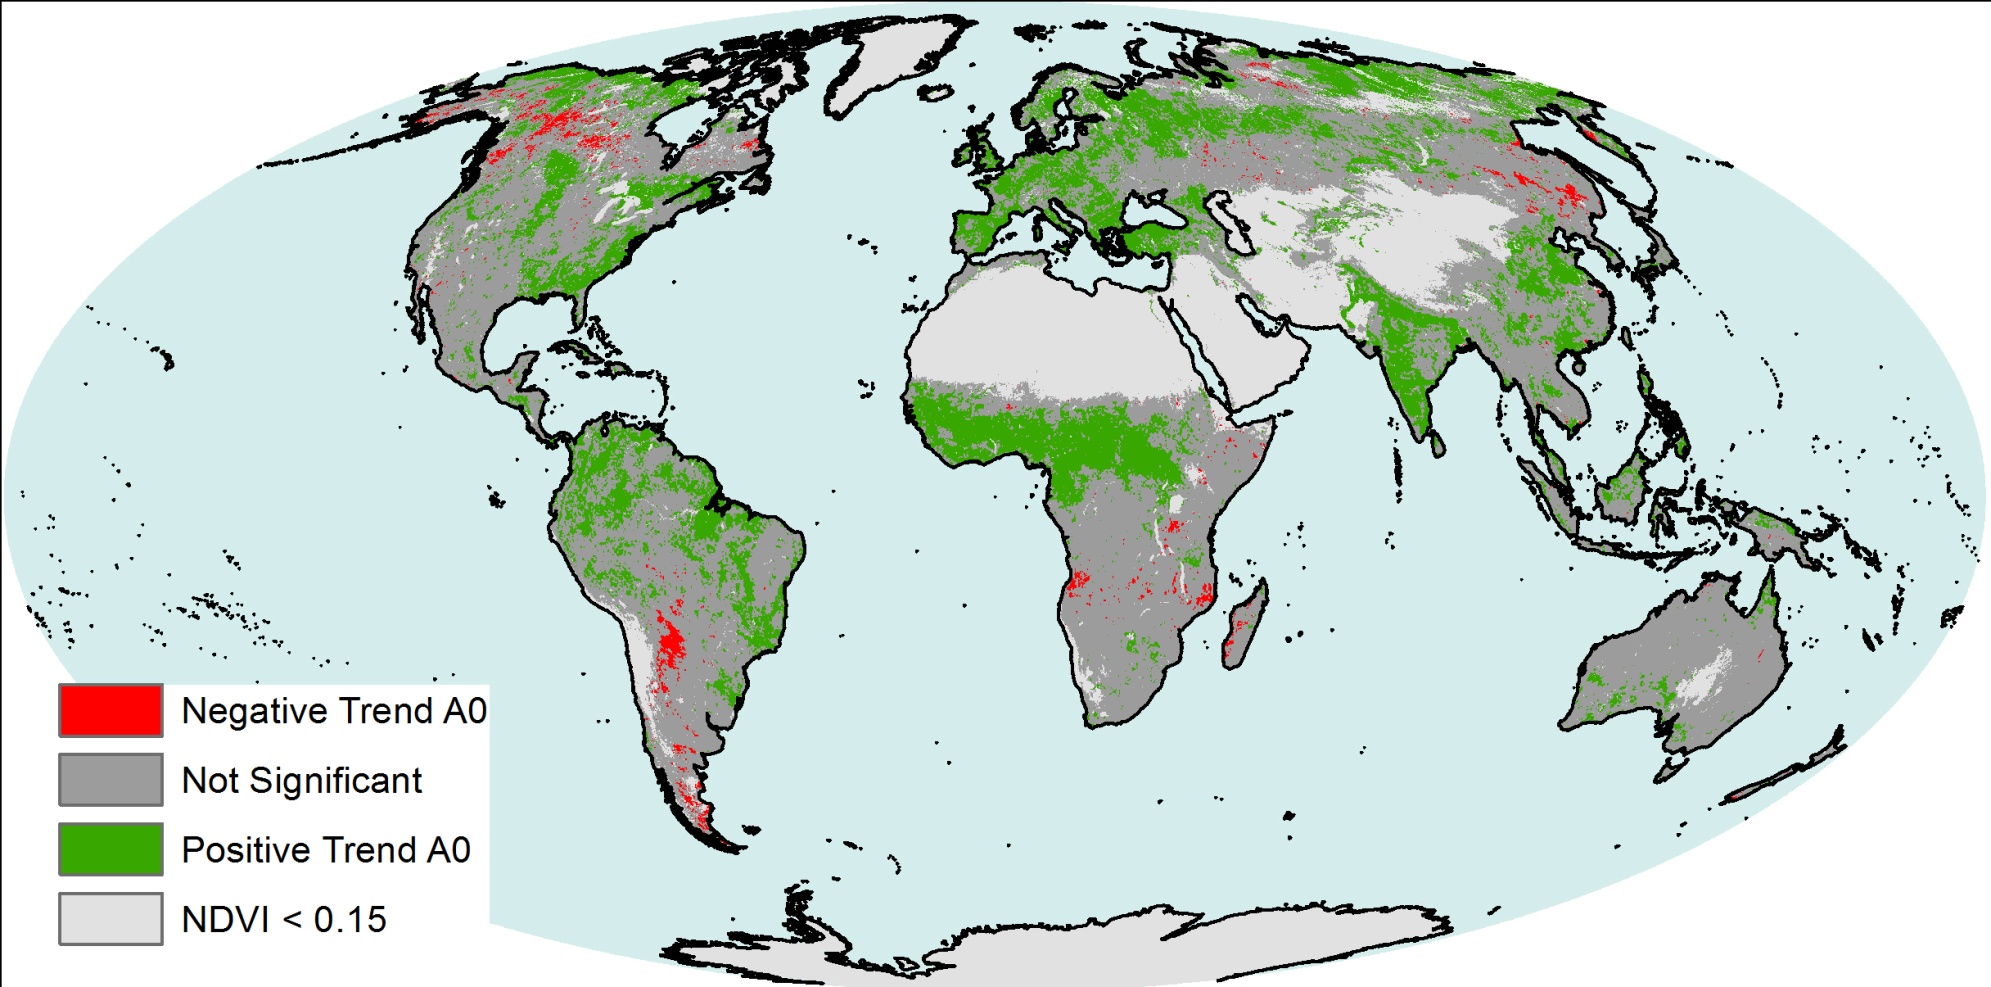


© 2013 by the authors; licensee MDPI, Basel, Switzerland. This article is an open access article distributed under the terms and conditions of the Creative Commons Attribution license (http://creativecommons.org/licenses/by/3.0/).
